# Supplementary figures and images for: Enhanced tumor therapy using vaccinia virus strain GLV-1h68 in combination with a β-galactosidase-activatable prodrug seco-analog of duocarmycin SA
Source: PubMed Central journal article supplement — Cancer Gene Ther. 2010 Sep 10;18(1):42–52. doi: 10.1038/cgt.2010.49 (PMC3007590; doi:10.1038/cgt.2010.49), 2010-09-10

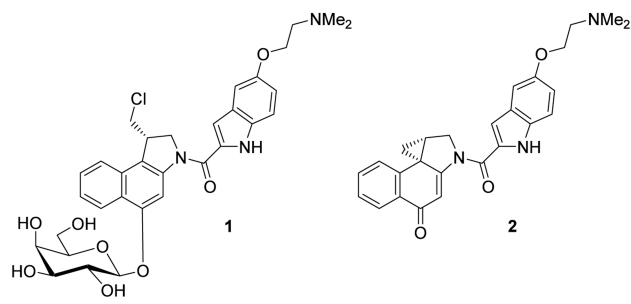

Supplement: cgt201049x1.pdf [file cgt201049x1.pdf]

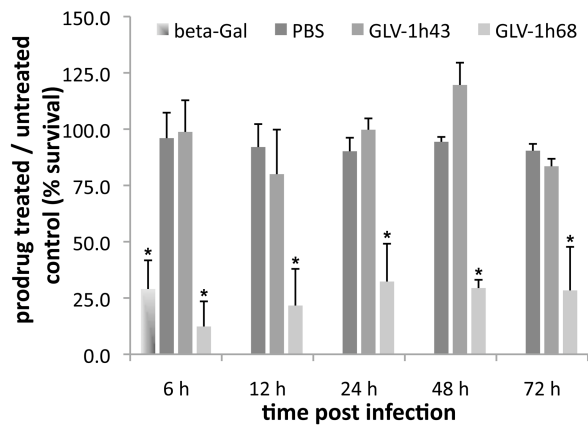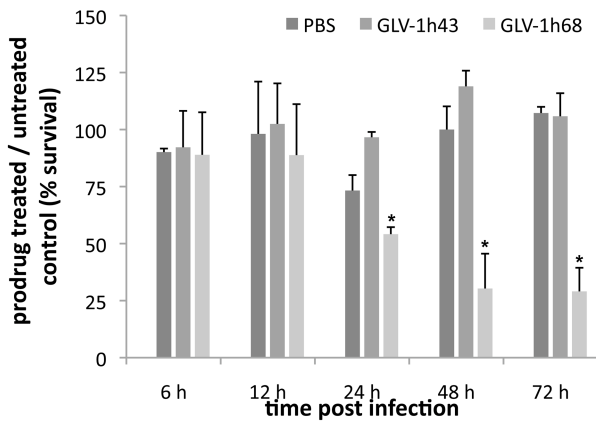

Supplement: cgt201049x2.pdf [file cgt201049x2.pdf]

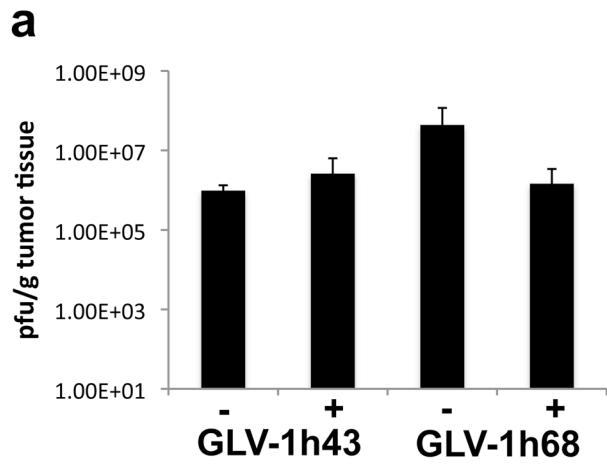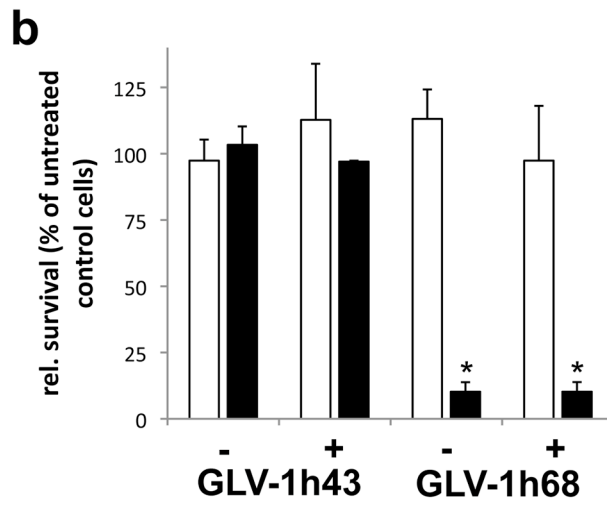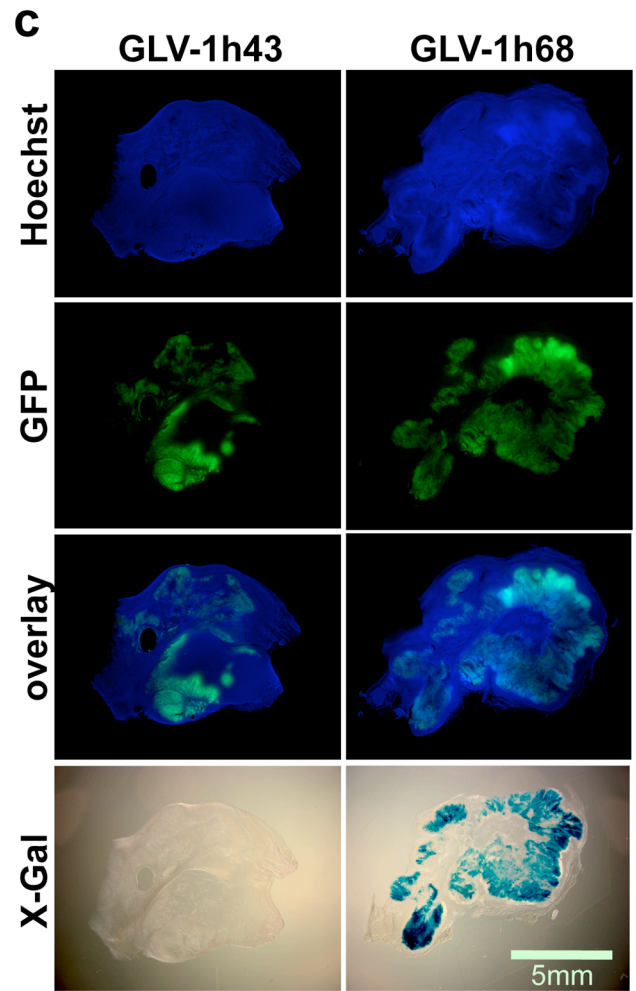

Supplement: cgt201049x3.pdf [file cgt201049x3.pdf]
